# Supplementary material for: Early developmental milestone clusters of autistic children based on electronic health records
Source: bioRxiv or medRxiv preprint supplement (doi:10.1101/2024.01.16.24301373), 2024-01-17
Supplement: Supplementary file [file media-1.pdf]

## Supplemental materials

Figure S1. Distribution of the number of missing milestones among ASD children

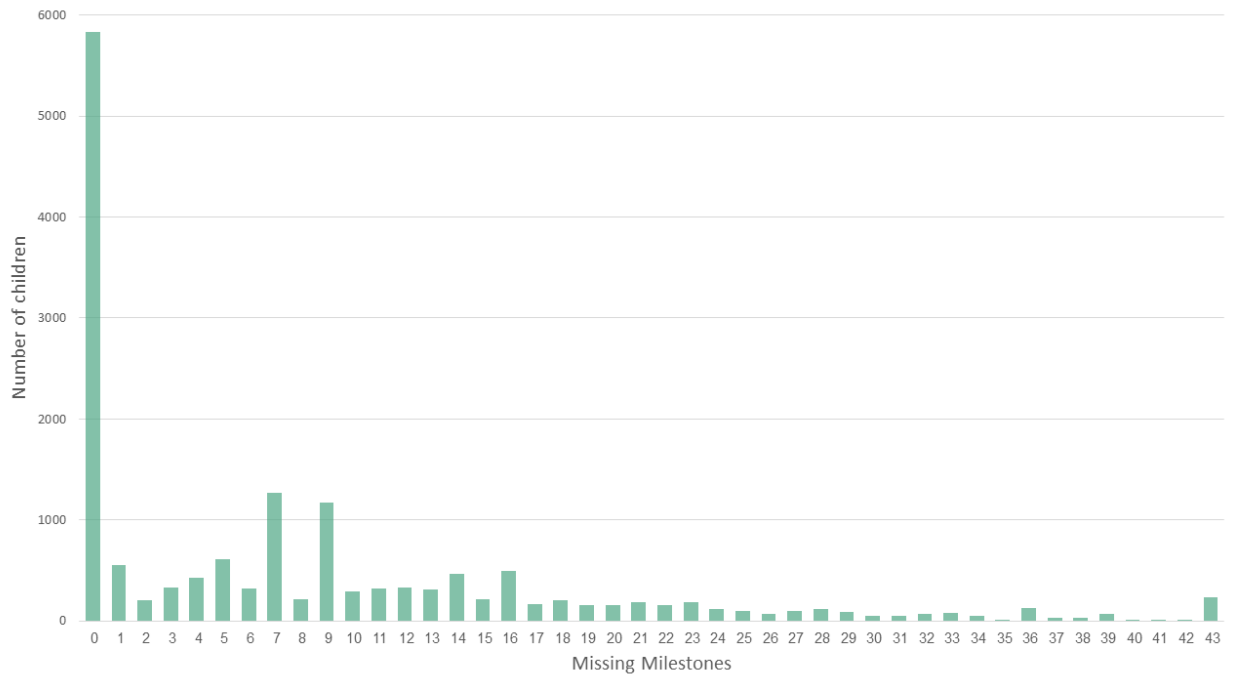

*Note.* 5836 ASD children had 0 missing milestones.

Figure S2. The number of participants in each of 9 clusters.

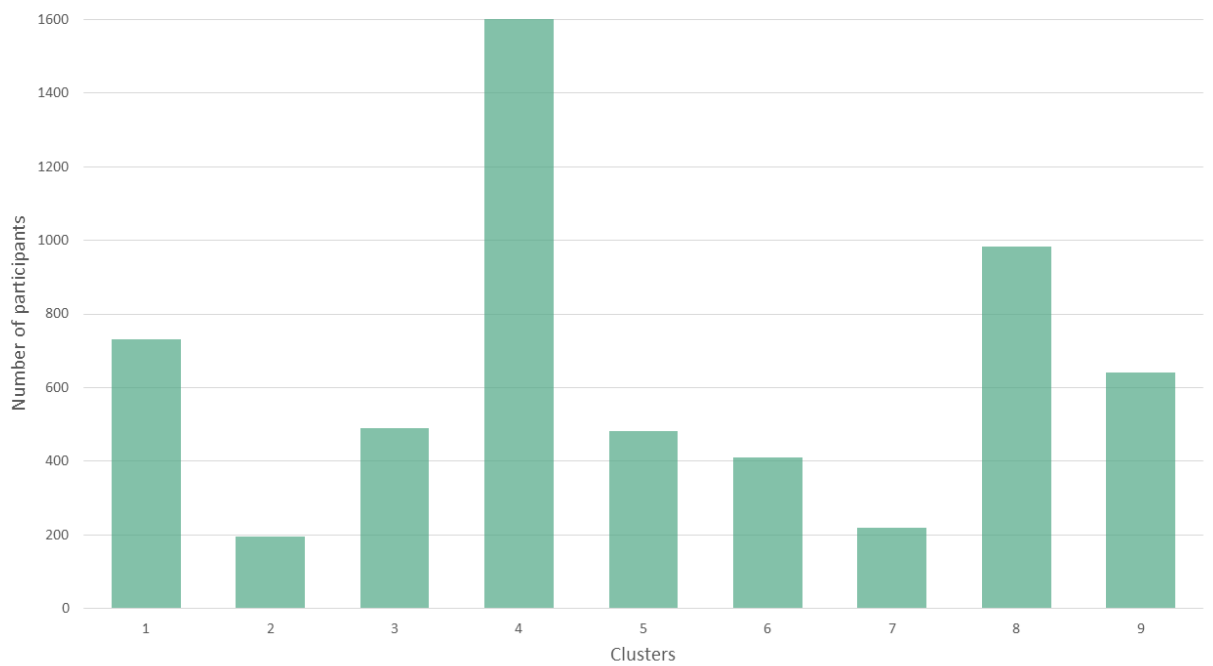

Figure S3 Development of clusters across time in language-social relative to motor domains.

3a. Development of initial 9 clusters across time.

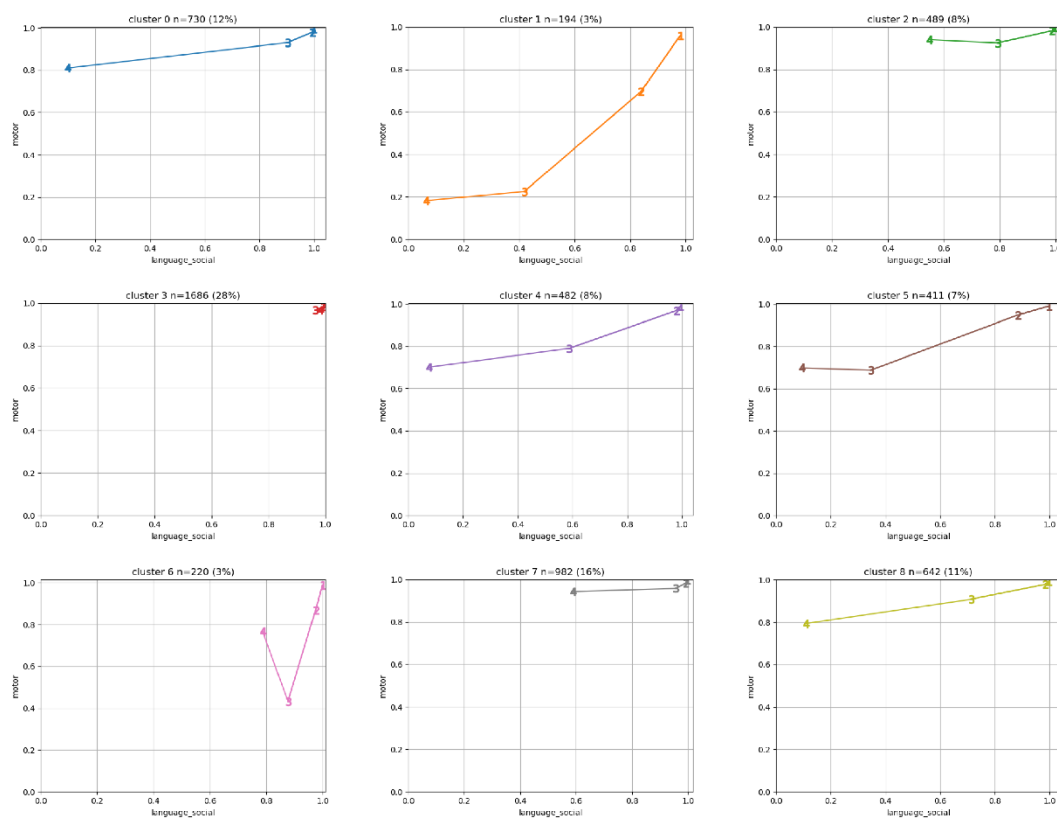

*Note.* For descriptive purposes, mean passing rates in each domain were computed for 4 time points: time 1= up to 6 months, time 2= 6–12 months, time 3=12–24 months, time 4=24–36 months. For visualization we grouped fine and gross motor into the motor axis, and language and social milestones into a language-social axis. These nine clusters were grouped into four clusters based on their similarities as follows: Typical cluster= cluster 3 high across all points. Moderate cluster= clusters 0,4,5,8 with a mixed language-social and mild motor involvement. Mild cluster= clusters 2,6,7 language-social delay. Severe cluster=cluster 1 with low language-social scores as motor delay.

### 3b. Development of 4 clusters across time.

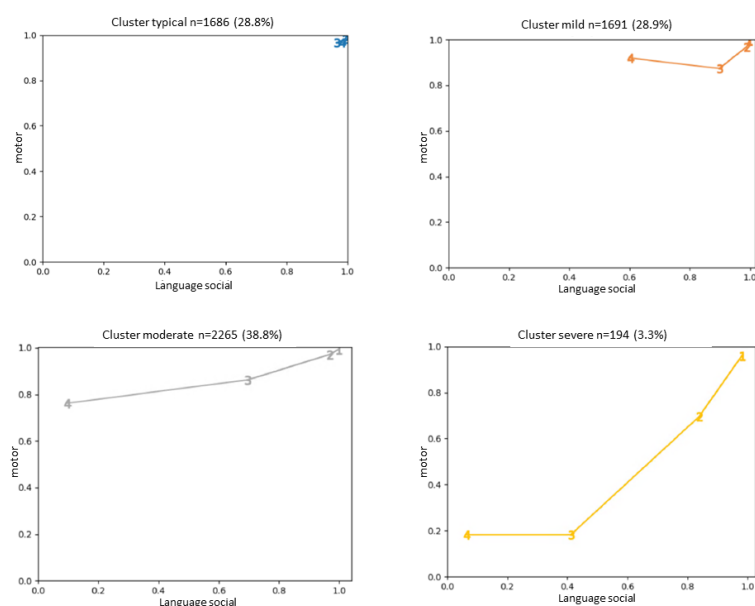

*Note.* Numbers on graph points represent times. Motor refers to gross and fine motor and language\_social refers to language and social domains. Time 1= up to 6 months, time 2= 6-12 months, time 3=12-24 months, time 4=24-36 months.

Table S1. Summary of Common Features for EDM Clusters

|              | <i>Milestone Delay (months)</i>                         |                   |                    |                                                |                      |                        |
|--------------|---------------------------------------------------------|-------------------|--------------------|------------------------------------------------|----------------------|------------------------|
|              | <i>Language / Social</i>                                | <i>Fine Motor</i> | <i>Gross Motor</i> | <i>Birth Parameters</i>                        | <i>Demo-graphics</i> | <i>Parent concerns</i> |
| EDM Typical  | No delay                                                | No delay          | No delay           |                                                | High SES             | Low                    |
| EDM Mild     | <b>24-36</b>                                            | No delay          | No delay           |                                                | Medium SES           | Medium                 |
| EDM Moderate | <b>12-18</b><br>greater magnitude from <b>18</b> months | <b>18-36</b>      | No delay           |                                                | Low SES              | High                   |
| EDM Severe   | <b>9-12</b><br>greater magnitude from <b>12</b> months. | <b>6-9</b>        | <b>6-9</b>         | Low birth weight.<br>Preterm<br>Cesarean birth | Low SES              | Highest                |
